# Supplementary material for: Application of a Machine Learning Method for Prediction of Urban Neighborhood-Scale Air Pollution
Source: MDPI journal article supplement (doi:10.3390/ijerph20032412), 2023-01-29
Supplement: s1 [file s1]

**Table S1.** Principal component analysis for the association between input parameters.

|                             | <u>Component 1</u> | <u>Component 2</u> | <u>Component 3</u> | <u>Component 4</u> |
|-----------------------------|--------------------|--------------------|--------------------|--------------------|
| Canyon air temperature      | <b>0.98</b>        | <b>-0.68</b>       | 0.01               | 0.01               |
| Background air temperature  | <b>0.98</b>        | -0.04              | 0.01               | -0.01              |
| Atmospheric pressure        | <b>-0.86</b>       | -0.03              | 0.15               | -0.08              |
| Background wind speed       | -0.17              | <b>-0.80</b>       | -0.05              | -0.08              |
| Canyon wind speed           | 0.19               | <b>0.61</b>        | 0.22               | -0.30              |
| Rainfall                    | -0.01              | <b>0.52</b>        | -0.10              | 0.36               |
| Canyon PM <sub>10</sub>     | 0.02               | -0.02              | <b>0.97</b>        | 0.08               |
| Background PM <sub>10</sub> | -0.13              | 0.02               | <b>0.92</b>        | 0.04               |
| Canyon wind direction       | -0.06              | -0.25              | 0.07               | <b>0.76</b>        |
| Background wind direction   | 0.15               | 0.12               | 0.03               | <b>0.76</b>        |

Absolute value > 0.5 is bolded.
